# Supplementary material for: A missense variant in FTCD is associated with arsenic metabolism and toxicity phenotypes in Bangladesh
Source: PubMed Central journal article supplement (PMC6443193; doi:10.1371/journal.pgen.1007984), 2019-03-20

chr21:47572887 T/C

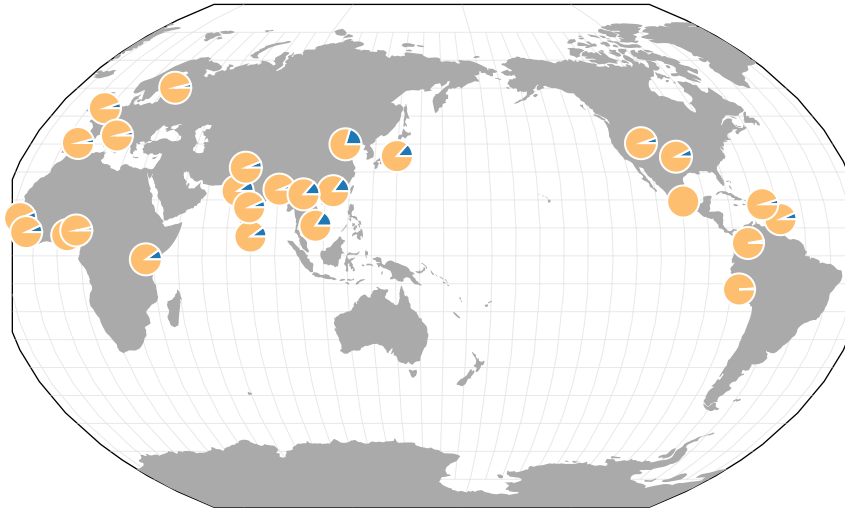

*Frequency Scale = Proportion out of 1*  
The pie below represents a minor allele frequency of 0.25

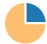

Sample sizes below 30 become increasingly transparent to represent uncertain frequencies, i.e.

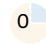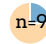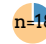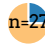

Supplement: pgen.1007984.s003.pdf [file pgen.1007984.s003.pdf]
