# Supplementary material for: A missense variant in FTCD is associated with arsenic metabolism and toxicity phenotypes in Bangladesh
Source: PubMed Central journal article supplement (PMC6443193; doi:10.1371/journal.pgen.1007984), 2019-03-20

Proxies for rs61735836 in BEB

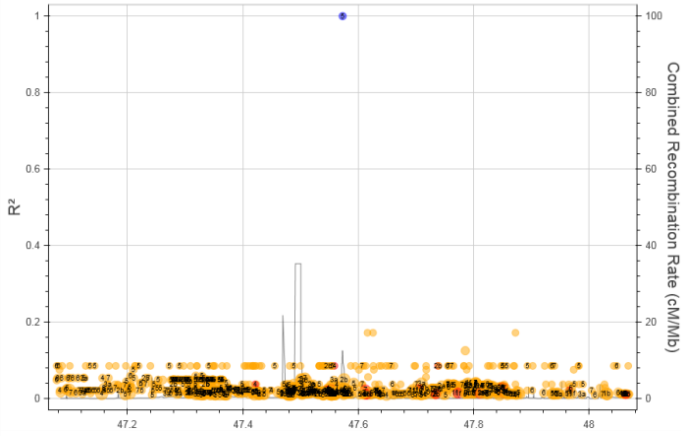

Proxies for rs61735836 in SAS

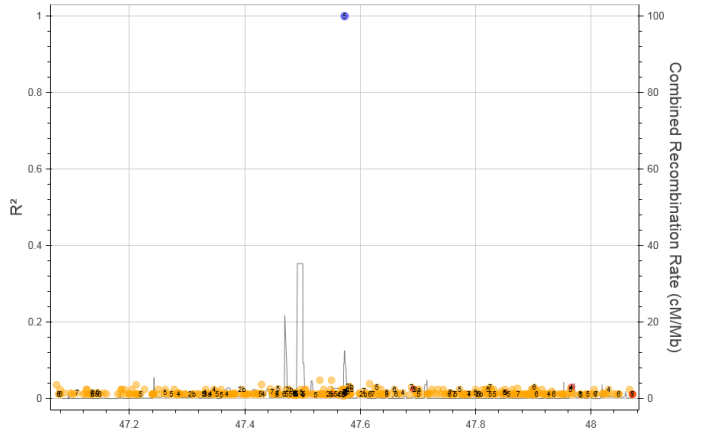

Proxies for rs61735836 in AFR

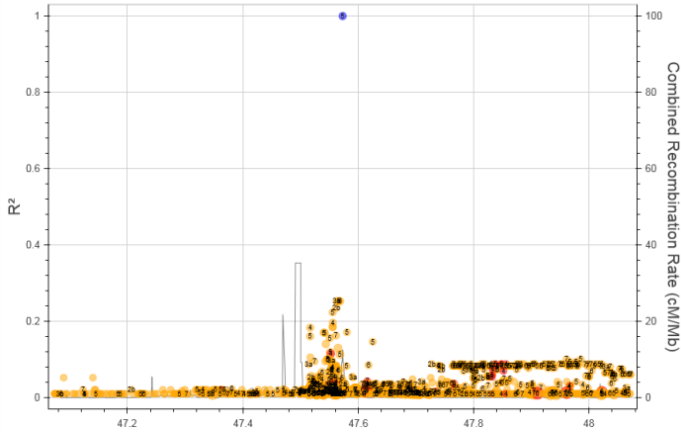

Proxies for rs61735836 in AMR

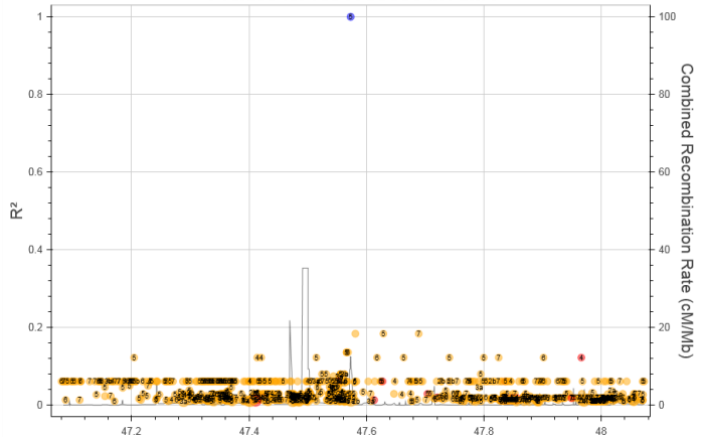

Proxies for rs61735836 in EAS

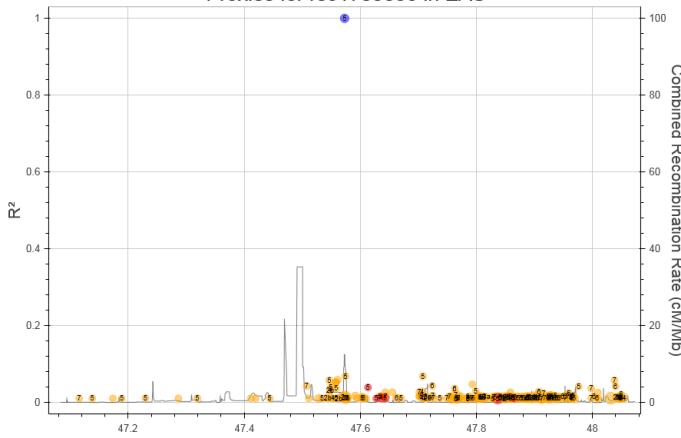

Proxies for rs61735836 in EUR

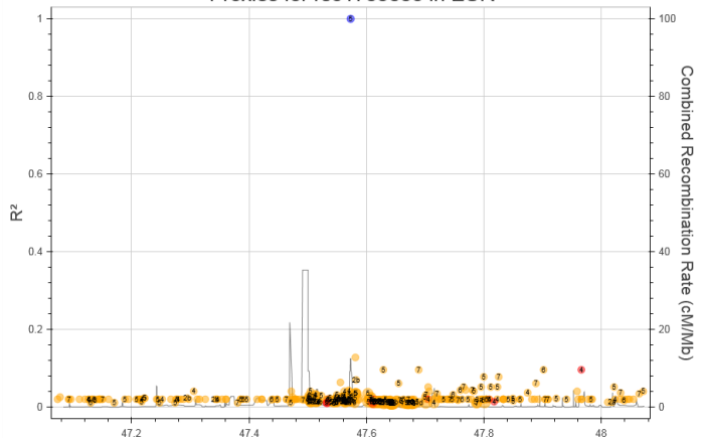

Supplement: pgen.1007984.s004.pdf [file pgen.1007984.s004.pdf]
