# Supplementary material for: A missense variant in FTCD is associated with arsenic metabolism and toxicity phenotypes in Bangladesh
Source: PubMed Central journal article supplement (PMC6443193; doi:10.1371/journal.pgen.1007984), 2019-03-20

ENSG00000160282.9 Gene Expression

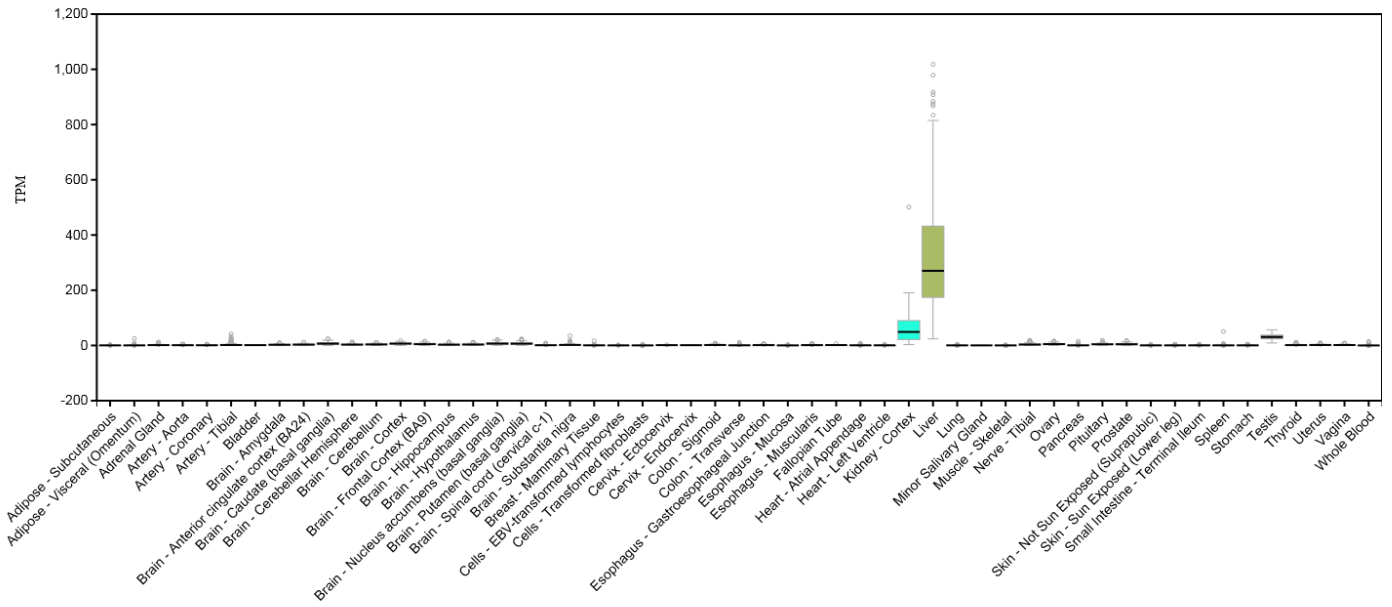

ENSG00000160282.9 Gene Expression

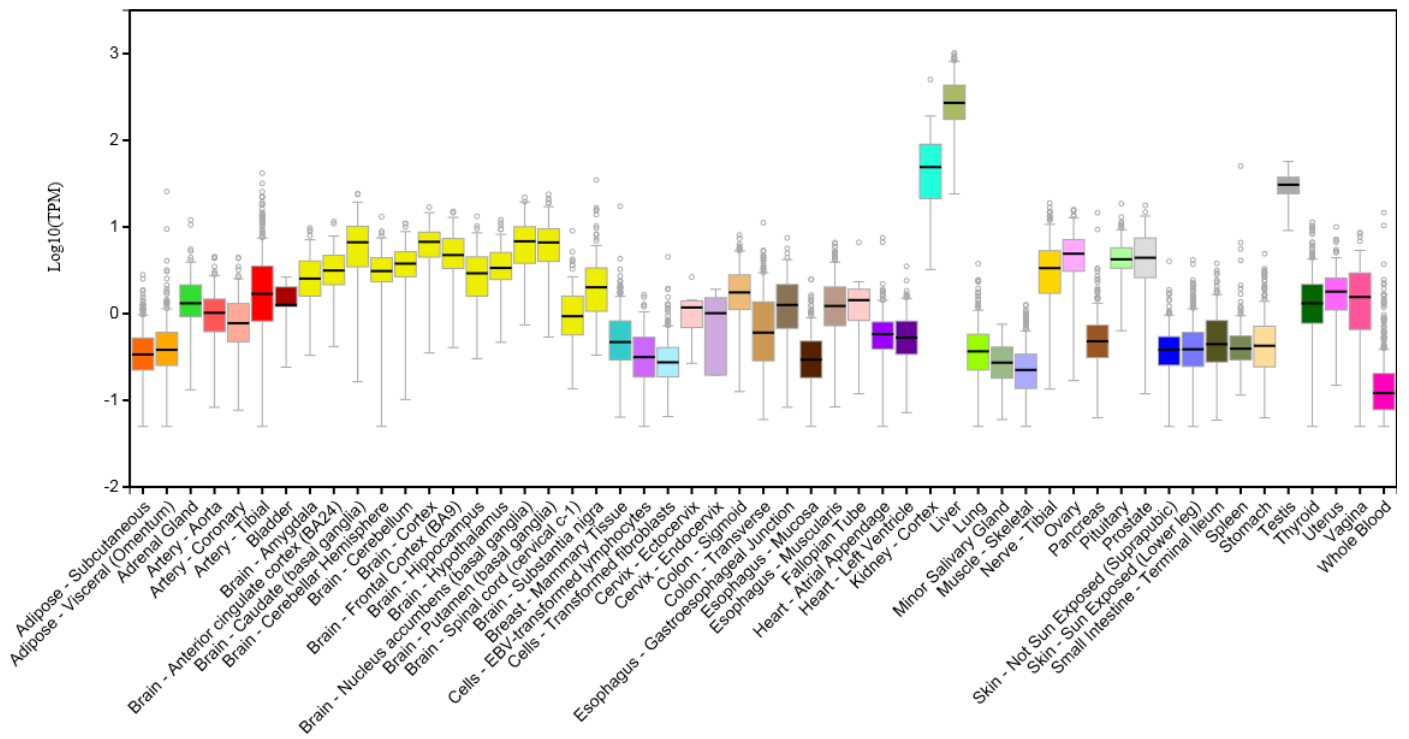

Supplement: pgen.1007984.s005.pdf [file pgen.1007984.s005.pdf]
