# Supplementary material for: A missense variant in FTCD is associated with arsenic metabolism and toxicity phenotypes in Bangladesh
Source: PubMed Central journal article supplement (PMC6443193; doi:10.1371/journal.pgen.1007984), 2019-03-20

**The first AUG** is the canonical start codon, but this sequence does not have a G following the start codon (GCCAUGU).

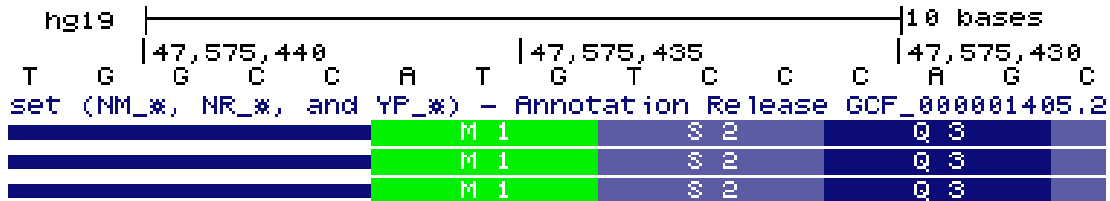

**The second AUG** is in exon 2 which also does not have a G following the start codon (GACAUGA).

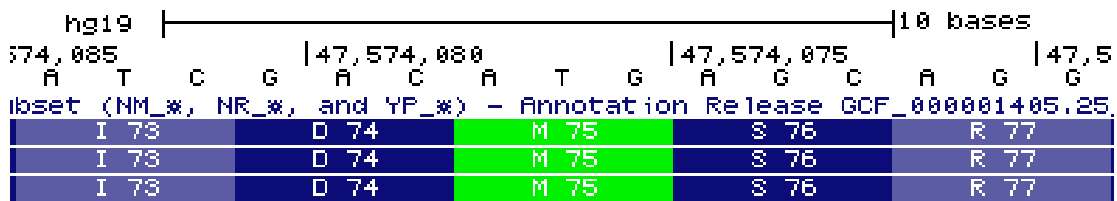

**The third AUG** is in exon 3, which does not have an A or a G three bp upstream of the start codon (CGCAUGG).

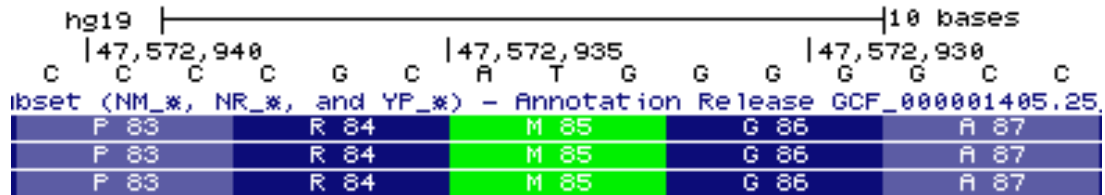

Supplement: pgen.1007984.s006.pdf [file pgen.1007984.s006.pdf]
