# Supplementary material for: A missense variant in FTCD is associated with arsenic metabolism and toxicity phenotypes in Bangladesh
Source: PubMed Central journal article supplement (PMC6443193; doi:10.1371/journal.pgen.1007984), 2019-03-20

### Mendelian randomization results for DMA%

| Method               | Estimate | SE    | P-value |
|----------------------|----------|-------|---------|
| Max likelihood       | -0.013   | 0.003 | 4.5E-7  |
| Simple median        | -0.011   | 0.003 | 7.1E-04 |
| Weighted median      | -0.011   | 0.003 | 5.9E-05 |
| IVW                  | -0.013   | 0.002 | 6.7E-08 |
| MR-Egger             | -0.011   | 0.008 | 0.170   |
| MR-Egger (intercept) | -0.006   | 0.029 | 0.832   |

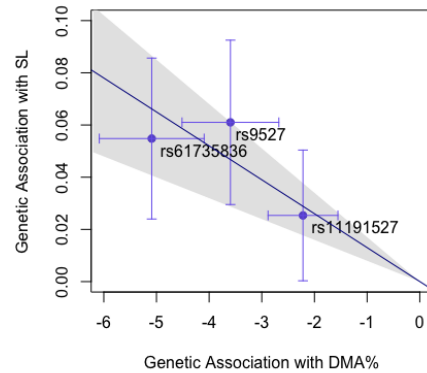

### Mendelian randomization results for MMA%

| Method               | Estimate | SE    | P-value |
|----------------------|----------|-------|---------|
| Max likelihood       | 0.026    | 0.005 | 6.8E-7  |
| Simple median        | 0.026    | 0.007 | 1.8E-04 |
| Weighted median      | 0.025    | 0.006 | 1.4E-05 |
| IVW                  | 0.026    | 0.005 | 4.6E-08 |
| MR-Egger             | 0.023    | 0.013 | 0.076   |
| MR-Egger (intercept) | 0.005    | 0.023 | 0.838   |

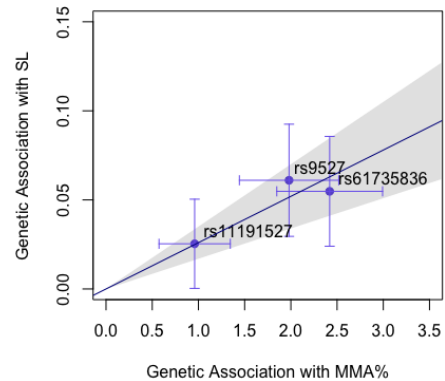

### Mendelian randomization results for iAs%

| Method               | Estimate | SE    | P-value |
|----------------------|----------|-------|---------|
| Max likelihood       | 0.024    | 0.005 | 2.9E-6  |
| Simple median        | 0.020    | 0.007 | 0.006   |
| Weighted median      | 0.020    | 0.006 | 6.6E-04 |
| IVW                  | 0.024    | 0.005 | 1.2E-07 |
| MR-Egger             | 0.017    | 0.021 | 0.414   |
| MR-Egger (intercept) | 0.014    | 0.038 | 0.716   |

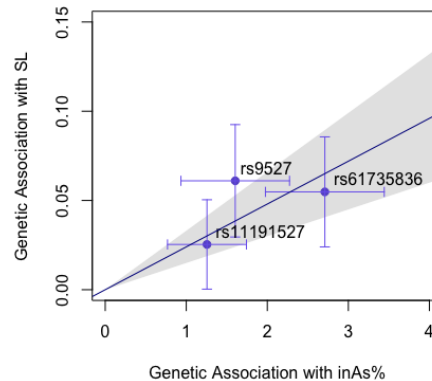

Supplement: pgen.1007984.s010.pdf [file pgen.1007984.s010.pdf]
