# Supplementary material for: A missense variant in FTCD is associated with arsenic metabolism and toxicity phenotypes in Bangladesh
Source: PubMed Central journal article supplement (PMC6443193; doi:10.1371/journal.pgen.1007984), 2019-03-20
Supplement: pgen.1007984.s011.pdf [file pgen.1007984.s011.pdf]

**S1 Table. Associations<sup>a</sup> between the minor allele of *FTCD* SNP rs61735836 (A) and arsenic metabolism phenotypes (n=1,660)**

|                                            | Per-allele association |       |          | AC vs. CC |      |          | AA vs. CC |      |          |
|--------------------------------------------|------------------------|-------|----------|-----------|------|----------|-----------|------|----------|
|                                            | Beta                   | SE    | P-value  | Beta      | SE   | P-value  | Beta      | SE   | P-value  |
| <b>Arsenic metabolites</b>                 |                        |       |          |           |      |          |           |      |          |
| DMA%                                       | -5.09                  | 0.51  | 5.76E-23 | -4.86     | 0.57 | 1.29E-17 | -6.05     | 1.15 | 1.52E-07 |
| MMA%                                       | 2.42                   | 0.29  | 2.16E-16 | 2.28      | 0.32 | 2.22E-12 | 3.03      | 0.65 | 3.71E-06 |
| iAs%                                       | 2.71                   | 0.37  | 7.56E-13 | 2.63      | 0.42 | 2.46E-10 | 3.04      | 0.85 | 3.26E-04 |
| ln(total Arsenic) <sup>b</sup>             | 0.07                   | 0.07  | 3.19E-01 | 0.08      | 0.08 | 0.29     | 0.02      | 0.15 | 0.89     |
| ln(DMA) <sup>b,c</sup>                     | -0.08                  | 0.007 | 3.14E-24 | -0.06     | 0.01 | 1.19E-12 | -0.08     | 0.02 | 7.33E-05 |
| ln(MMA) <sup>b,c</sup>                     | 0.18                   | 0.02  | 2.21E-14 | 0.17      | 0.03 | 1.60E-11 | 0.20      | 0.05 | 1.92E-04 |
| ln(iAs) <sup>b,c</sup>                     | 0.19                   | 0.02  | 7.30E-14 | 0.19      | 0.03 | 7.16E-12 | 0.18      | 0.06 | 1.81E-03 |
| <b>Latent Phenotypes (PCA)<sup>d</sup></b> |                        |       |          |           |      |          |           |      |          |
| PC1                                        | 0.91                   | 0.09  | 1.16E-23 | 0.88      | 0.10 | 5.26E-19 | 1.08      | 0.20 | 6.56E-08 |
| PC2                                        | 0.06                   | 0.06  | 3.21E-01 | 0.03      | 0.06 | 0.59     | 0.11      | 0.12 | 0.39     |
| <b>Methylation indices<sup>e</sup></b>     |                        |       |          |           |      |          |           |      |          |
| PMI                                        | -0.03                  | 0.04  | 4.92E-01 | -0.04     | 0.05 | 0.42     | -0.01     | 0.10 | 0.90     |
| SMI                                        | -1.51                  | 0.22  | 3.88E-12 | -1.55     | 0.24 | 1.21E-10 | -1.42     | 0.50 | 4.72E-03 |

<sup>a</sup> associations estimated using a linear mixed model adjusting for age, sex, and relatedness in GEMMA

<sup>b</sup> phenotypes are natural log-transformed to reduce skewness

<sup>c</sup> phenotypes are raw metabolite concentrations, not percentages of total arsenic. Regressions are adjusted for total arsenic.

<sup>d</sup> phenotypes are latent variables obtained from principle components analysis (PCA) of all three metabolite percentages.

<sup>e</sup> PMI (primary methylation index) = MMA/iAs; SMI (secondary methylation index) = DMA/MMA

<sup>f</sup> number of participants with rs61735836 genotypes of CC, AC, AA were 1417, 231 and 12 respectively.
