# Supplementary material for: A missense variant in FTCD is associated with arsenic metabolism and toxicity phenotypes in Bangladesh
Source: PubMed Central journal article supplement (PMC6443193; doi:10.1371/journal.pgen.1007984), 2019-03-20
Supplement: pgen.1007984.s012.pdf [file pgen.1007984.s012.pdf]

**S2 Table. Associations<sup>a</sup> between the minor allele of *FTCD* SNP rs61735836 (A) and arsenic metabolism phenotypes, stratified by sex and median age (n=1,660)**

|                                            | Male  |      |          | Female |      |          | ≤37 years of age |      |          | >37 years of age |      |          |
|--------------------------------------------|-------|------|----------|--------|------|----------|------------------|------|----------|------------------|------|----------|
|                                            | Beta  | SE   | P-value  | Beta   | SE   | P-value  | Beta             | SE   | P-value  | Beta             | SE   | P-value  |
| <b>Arsenic species</b>                     |       |      |          |        |      |          |                  |      |          |                  |      |          |
| DMA%                                       | -5.31 | 0.7  | 2.39E-14 | -4.94  | 0.77 | 1.08E-10 | -4.82            | 0.77 | 3.09E-10 | -5.65            | 0.78 | 4.65E-13 |
| MMA%                                       | 2.58  | 0.43 | 1.91E-09 | 2.23   | 0.41 | 6.15E-08 | 1.97             | 0.44 | 7.63E-06 | 3.01             | 0.48 | 2.94E-10 |
| iAs%                                       | 2.75  | 0.48 | 8.11E-09 | 2.78   | 0.57 | 1.06E-06 | 2.85             | 0.56 | 2.85E-07 | 2.63             | 0.53 | 6.94E-07 |
| ln(total Arsenic) <sup>b</sup>             | -0.07 | 0.1  | 4.55E-01 | 0.21   | 0.1  | 3.01E-02 | 0.21             | 0.1  | 3.30E-02 | -0.04            | 0.1  | 6.73E-01 |
| <b>Latent Phenotypes (PCA)<sup>c</sup></b> |       |      |          |        |      |          |                  |      |          |                  |      |          |
| PC1                                        | 0.94  | 0.12 | 2.26E-14 | 0.89   | 0.13 | 2.57E-11 | 0.85             | 0.14 | 3.08E-10 | 1.01             | 0.14 | 2.23E-13 |
| PC2                                        | 0.07  | 0.08 | 3.26E-01 | 0.02   | 0.08 | 7.86E-01 | -0.03            | 0.08 | 6.85E-01 | 0.15             | 0.08 | 8.25E-02 |
| <b>Methylation indices<sup>d</sup></b>     |       |      |          |        |      |          |                  |      |          |                  |      |          |
| PMI                                        | -0.02 | 0.04 | 6.65E-01 | -0.01  | 0.04 | 7.94E-01 | -0.05            | 0.04 | 1.95E-01 | 0.03             | 0.04 | 5.58E-01 |
| SMI                                        | -1.18 | 0.2  | 4.53E-09 | -1.69  | 0.32 | 1.28E-07 | -1.35            | 0.31 | 1.59E-05 | -1.61            | 0.28 | 5.70E-09 |

<sup>a</sup> associations estimated using a linear mixed model adjusting for age, sex, and relatedness in GEMMA

<sup>b</sup> natural log-transformed to reduce skewness

<sup>c</sup> phenotypes are latent variables obtained from principle components analysis (PCA) of all three metabolite percentages.

<sup>d</sup> PMI (primary methylation index) = MMA/iAs; SMI (secondary methylation index) = DMA/MMA
