# Supplementary material for: A missense variant in FTCD is associated with arsenic metabolism and toxicity phenotypes in Bangladesh
Source: PubMed Central journal article supplement (PMC6443193; doi:10.1371/journal.pgen.1007984), 2019-03-20
Supplement: pgen.1007984.s014.pdf [file pgen.1007984.s014.pdf]

**S4 Table. Associations<sup>a</sup> between the minor alleles<sup>b</sup> at FTCD and AS3MT SNPs with arsenic species percentages measured in blood at two time points (n=155)**

| Outcome                                             | rs61735836 (FTCD) |      |         | rs9527 (AS3MT) |      |         | rs11191527 (AS3MT) |      |         |
|-----------------------------------------------------|-------------------|------|---------|----------------|------|---------|--------------------|------|---------|
|                                                     | Beta              | SE   | P-value | Beta           | SE   | P-value | Beta               | SE   | P-value |
| <b>DMA% at Week 0</b>                               | -2.92             | 1.22 | 0.02    | -1.59          | 1.22 | 0.19    | 1.25               | 0.87 | 0.15    |
| <b>DMA% at Week 12</b>                              | -2.80             | 1.82 | 0.13    | -1.17          | 1.79 | 0.51    | 1.09               | 1.26 | 0.39    |
| <b>DMA% at Weeks 0 and 12</b>                       | -2.87             | 1.01 | 0.005   | -1.46          | 1.00 | 0.15    | 1.21               | 0.71 | 0.09    |
| <b>InAs% at Week 0</b>                              | 1.90              | 0.79 | 0.02    | 0.03           | 0.80 | 0.97    | -0.02              | 0.58 | 0.98    |
| <b>InAs% at Week 12</b>                             | -1.03             | 1.18 | 0.39    | -0.24          | 1.15 | 0.83    | -0.62              | 0.81 | 0.45    |
| <b>InAs% at Weeks 0 and 12</b>                      | 0.96              | 0.66 | 0.15    | -0.06          | 0.65 | 0.93    | -0.22              | 0.47 | 0.64    |
| <b>MMA% at Week 0</b>                               | 1.02              | 1.22 | 0.41    | 1.56           | 1.20 | 0.20    | -1.24              | 0.86 | 0.15    |
| <b>MMA% at Week 12</b>                              | 3.83              | 1.35 | 0.01    | 1.42           | 1.36 | 0.30    | -0.48              | 0.96 | 0.62    |
| <b>MMA% at Weeks 0 and 12</b>                       | 2.19              | 0.91 | 0.02    | 1.50           | 0.90 | 0.10    | -0.93              | 0.64 | 0.15    |
| <b>Total blood As<sup>c</sup> at Week 0</b>         | 0.08              | 0.13 | 0.57    | -0.02          | 0.13 | 0.88    | -0.12              | 0.09 | 0.20    |
| <b>Total blood As<sup>c</sup> at Week 12</b>        | 0.28              | 0.14 | 0.06    | 0.06           | 0.14 | 0.66    | -0.08              | 0.10 | 0.44    |
| <b>Total blood As<sup>c</sup> at Weeks 0 and 12</b> | 0.15              | 0.10 | 0.11    | 0.01           | 0.10 | 0.88    | -0.10              | 0.07 | 0.14    |

<sup>a</sup>Linear models adjusting for age, sex and genotyping batch were used for analyses of Week 0 and Week 12 data. Linear mixed models adjusting for age, sex and genotyping batch, random effect of week/timepoint were used for combined analysis of Week 0 and Week 12 blood arsenic data. Models for rs11191527 were also adjusted for rs9527, and vice versa.

<sup>b</sup>The minor alleles of the three SNPs were all T. The MAF for rs61735836 is 8%, the MAF for rs9527 is 7% and the MAF for rs11191527 is 15%.

<sup>c</sup>Total blood As is the sum of blood AsIII, AsV, MMA and DMA measurements.
